# Supplementary material
Source: PubMed Central journal article supplement (PMC4109161)
Supplement: NIHMS607933-supplement-1.pdf [file NIHMS607933-supplement-1.pdf]

## 17 **Rate of Decline in FEV<sub>1</sub> in CF Patients Before and After an Arbitrary Time Point**

18

19 Previous studies had evaluated the acute change in lung function after initiation of a new therapy,  
20 but in this study we wanted to evaluate the change in the rate of decline. A therapy that causes a  
21 lasting improvement in the rate of decline has the potential to greatly improve lung function for  
22 patients and may improve survival for cystic fibrosis (CF) patients.

23

24 In this supplement, we seek to explain what happens to the trajectory of lung function in CF  
25 patients unrelated to an acute event. Consider choosing an arbitrary point in time and assessing  
26 the lung function of a CF patient, as measured by forced expiratory volume in 1 second (FEV<sub>1</sub>)  
27 % predicted, before and after that index time. At first thought, it may seem that there is no reason  
28 that the rate of decline would be any different before and after the arbitrary index time. However,  
29 Konstan et al (E1) have shown that among a number of risk factors for decline, high lung  
30 function is an independent risk factor. Therefore, patients with higher-than-average lung function  
31 are expected to experience a steeper-than-average decline going forward, and patients with lower  
32 lung function are expected to experience a less steep decline going forward. Furthermore, it  
33 stands to reason that patients with relatively high lung function at that index time are likely to  
34 have had more gradual prior decline than patients with relatively low lung function. (This is a  
35 sort of regression-to-the-mean effect looking backward in time.) These two factors combine to  
36 produce the expectation that patients with relatively high lung function at the index time are  
37 likely to show a change from mild decline to steeper decline, whereas those with relatively low  
38 lung function are likely to show a change from steep decline to milder decline. Thus, the null

39 hypothesis of no change in average decline before and after an arbitrary index time may need to  
40 be adjusted depending on the measured lung function at that index time.

41

42 In this supplement, we quantify the average rates of decline in FEV<sub>1</sub> % predicted before and after  
43 an index time, separately by disease stage, using spirometry data from all patients at least 6 years  
44 of age in the Epidemiologic Study of Cystic Fibrosis (ESCF), regardless of treatment. An index  
45 pulmonary function test (PFT) was defined as the PFT closest (within 30 days) to the first  
46 encounter within 1 year following the eighth or subsequent even-numbered birthday. (Even-  
47 numbered birthdays were used to avoid having overlapping pre-index periods.) The pre-index  
48 and post-index periods – each 2 years in duration – were each required to have  $\geq 1$  encounter and  
49  $\geq 3$  FEV<sub>1</sub> values spanning at least 6 months to estimate the slope of FEV<sub>1</sub>. Patients were included  
50 for as many sets of pre-index and post-index periods as they had available data.

51

52 When we characterized disease stage using FEV<sub>1</sub> % predicted values, we ran into the difficulty  
53 that there were few younger patients in the most severe categories and few older patients in the  
54 least severe categories. To provide for a more balanced distribution across categories by age, we  
55 characterized lung function relative to other CF patients at every age from 8 to 38 years using all  
56 PFTs in the ESCF (N = 535,344) to establish age-specific deciles of FEV<sub>1</sub> % predicted. Values  
57 defining the ten deciles by age are given in E-Table 1 and plotted in E-Figure 1.

58

59 For every patient and index value, separate regression lines were fit during each of the 2-year  
60 pre-index and post-index periods. The index PFT was used to establish the age-adjusted decile  
61 of severity but was excluded from both the pre-index and post-index periods to minimize issues

62 associated with regression to the mean. The regression lines were fit using PROC MIXED with  
63 4 random effects: intercept (at the index PFT) and slope before the index event, and change in  
64 intercept and change in slope after the index event. (See Technical Note, below, for additional  
65 details.) Values for FEV<sub>1</sub> % predicted were calculated using the equations of Wang et al (E2)  
66 for males through age 17 years and for females through age 15 years and from the equations of  
67 Hankinson et al (E3) for older patients.

68

69 E-Figure 2 shows the average pre-index and post-index fitted lines by decile; E-Table 2 provides  
70 the details. In addition to estimating the average lines by decile, an overall estimate was obtained  
71 by combining the deciles using equal weighting (each decile counted equally) and the observed  
72 distribution (each decile counted according to the number of patients represented). These two  
73 ways of combining the deciles differ because the number of patients with available data varied  
74 by decile; the figure presents the version based on the observed distribution.

75

76 The results show the anticipated “bowing.” The middle deciles have similar slope pre- and post-  
77 index with little change in intercept. For the lower deciles, the pre-index slopes are fairly steep  
78 compared to the post-index slopes, which are fairly flat. The opposite is the case for the higher  
79 deciles, where the pre-index slopes are fairly flat and the post-index slopes are fairly steep. The  
80 differences in estimated intercept are an indication that the straight lines do not adequately fit  
81 what is presumably a curved trajectory. Although it is reasonable to approximate the rate of  
82 change over short times using a straight line, fitting straight lines to up to 2 years of data may be  
83 more problematic. The more curved the true underlying trends, the more likely there is to be an  
84 observed difference in intercept when straight lines are fit.

85

86 A different way to look at these data is to examine the change in intercept and change in slope by  
87 decile. Change in intercept by FEV<sub>1</sub> decile is presented in E-Figure 3, which shows that some  
88 intercepts, especially at the highest deciles, are significantly different from zero, indicating a lack  
89 of fit in the model. Change in slope by FEV<sub>1</sub> decile is presented in E-Figure 4. This figure clearly  
90 shows the tendency for the trend line for the lowest deciles to flatten (change to a less negative  
91 slope) and for the trend line for the highest deciles to steepen (change to a more negative slope).  
92 For the lowest deciles (sickest patients), the slope improved by 2–3 points per year. For the  
93 highest deciles (healthiest patients), the slope worsened by 2–3 points.

94

95 The primary statistical model was unadjusted: it included time, the FEV<sub>1</sub> decile, and the  
96 interaction between decile and time. One concern was that part of the change in rate of decline  
97 over time might be due to the general tendency for patients to have more treatments over time.  
98 To address this and related questions, an adjusted model was estimated that included age and sex  
99 as fixed effects and various treatments as time-varying covariates. The estimated effect of the  
100 covariates and their associated standard errors were as follows: age (-1.72±0.01), female (-  
101 0.52±0.15), oral antibiotics (-0.76±0.03), inhaled antibiotics (0.08±0.03), oral bronchodilators (-  
102 0.31±0.08), inhaled bronchodilators (-0.51±0.05), oral corticosteroids (-1.89±0.05), inhaled  
103 corticosteroids (0.05±0.04), mast cell stabilizers (0.08±0.06), oral supplements (-0.21±0.04),  
104 enteral supplements (-1.79±0.08), parenteral supplements (-1.98±0.20), and pulmonary  
105 exacerbations treated with IV antibiotics (-2.11±0.04 any since previous PFT; 2.08±0.04 within  
106 28 days before the PFT; -5.42±0.04 within 28 days after the PFT). The results were remarkably  
107 similar to those for the unadjusted model (data not shown).

108

109 These results clearly show that the null hypothesis of no change in slope in FEV<sub>1</sub> % predicted is  
110 not appropriate for patients with low or high lung function relative to their peers. It provides  
111 some quantitative guidance about the magnitude of the expected change in slope looking before  
112 and after an arbitrary index time based on age-adjusted decile of FEV<sub>1</sub> % predicted.

113

#### 114 **Technical Note**

115 In the mixed model, the pre-index slope, intercept (at the index date) of the pre-index line,  
116 difference in slope (post-index minus pre-index), and difference in intercept (post-index minus  
117 pre-index) were treated as random effects at the patient-index point level. To fully account for  
118 the repeated use of patients, variance components would be estimated at the patient level for all 4  
119 parameters, but we found that the patient-level parameters corresponding to difference in slope  
120 and difference in intercept were near zero and so were dropped. This means that we effectively  
121 assumed that the variability in amount of *change* in slope and *change* in intercept within patients  
122 was similar to the variability between patients. In contrast, the overall slope and intercept were  
123 more similar within patients than between patients, so those variance components were retained  
124 in the model.

125

126 The model code includes the following statements within PROC MIXED:

```
127 class patid patid_age decile;  
128 model fevlpct = decile decile*t decile*t0 decile*tafter  
129           [list of covariates] / solution ddfm=bw;  
130 random intercept t / sub=patid type=fa0(2) g gcorr;  
131 random intercept t t0 tafter / sub=patid_age(patid) type=fa0(4) g gcorr;  
132
```

133 The variable t represents time in years ranging from -2 to +2 where 0 represents the index PFT.

134 The variable t0=max(t,0) and is therefore 0 for t≤0 and equal to t thereafter; this represents the

135 change in slope. The indicator variable  $t_{\text{after}}$  is 1 if  $t > 0$  and 0 otherwise and represents the  
136 change in intercept.

137 **E-References**

138

139 E1. Konstan MW, Morgan WJ, Butler SM, Pasta DJ, Craib ML, Silva SJ, Stokes DC, Wohl ME,  
140 Wagener JS, Regelmann WE, Johnson CA. Risk factors for rate of decline in forced expiratory  
141 volume in one second in children and adolescents with cystic fibrosis. *J Pediatr* 2007;151:134–  
142 139.

143 E2. Wang X, Dockery DW, Wypij D, Fay ME, Ferris BG, Jr. Pulmonary function between 6  
144 and 18 years of age. *Pediatr Pulmonol* 1993;15:75–88.

145 E3. Hankinson JL, Odencrantz JR, Fedan KB. Spirometric reference values from a sample of  
146 the general U.S. population. *Am J Respir Crit Care Med* 1999;159:179–187.

147



- 148 E-Fig. 1. FEV<sub>1</sub> % predicted decile by age at PFT for all patients enrolled in the ESCF.  
149  
150 E-Fig. 2. Pre- and post-index slopes and increment at index event by FEV<sub>1</sub> decile – unadjusted  
151 model.  
152  
153 E-Fig. 3. Change in intercept by FEV<sub>1</sub> decile – unadjusted model (error bars represent 95%  
154 confidence interval).  
155  
156 E-Fig. 4. Change in slope by FEV<sub>1</sub> decile\*– unadjusted model (error bars represent 95%  
157 confidence interval).

1 **E-TABLE 1—FEV<sub>1</sub> % Predicted Decile\* 10<sup>th</sup> to 90<sup>th</sup> Percentiles by Age for All Patients Enrolled in the ESCF**

| Age | 10 <sup>th</sup> %ile | 20 <sup>th</sup> %ile | 30 <sup>th</sup> %ile | 40 <sup>th</sup> %ile | 50 <sup>th</sup> %ile | 60 <sup>th</sup> %ile | 70 <sup>th</sup> %ile | 80 <sup>th</sup> %ile | 90 <sup>th</sup> %ile |
|-----|-----------------------|-----------------------|-----------------------|-----------------------|-----------------------|-----------------------|-----------------------|-----------------------|-----------------------|
| 8   | 50.5                  | 64.2                  | 73.6                  | 81.1                  | 87.3                  | 92.7                  | 98.1                  | 103.6                 | 111.2                 |
| 9   | 48.0                  | 62.3                  | 72.3                  | 79.7                  | 86.1                  | 91.7                  | 97.0                  | 102.9                 | 110.7                 |
| 10  | 47.7                  | 61.1                  | 71.0                  | 79.0                  | 85.4                  | 91.0                  | 96.4                  | 102.2                 | 109.8                 |
| 11  | 46.2                  | 60.0                  | 69.8                  | 77.5                  | 84.0                  | 89.8                  | 95.4                  | 101.3                 | 109.0                 |
| 12  | 42.4                  | 55.5                  | 65.8                  | 74.0                  | 81.2                  | 87.4                  | 93.4                  | 99.9                  | 107.9                 |
| 13  | 40.2                  | 52.5                  | 62.9                  | 71.3                  | 78.4                  | 84.8                  | 91.3                  | 97.9                  | 106.4                 |
| 14  | 37.7                  | 49.7                  | 59.8                  | 68.0                  | 75.4                  | 82.1                  | 88.8                  | 95.8                  | 104.5                 |
| 15  | 35.2                  | 46.2                  | 55.8                  | 64.2                  | 71.8                  | 78.9                  | 85.6                  | 93.0                  | 102.0                 |
| 16  | 32.9                  | 43.3                  | 52.3                  | 60.2                  | 67.5                  | 74.5                  | 81.4                  | 89.0                  | 98.4                  |
| 17  | 31.2                  | 40.4                  | 49.1                  | 56.8                  | 64.1                  | 71.1                  | 78.3                  | 86.1                  | 95.6                  |
| 18  | 29.1                  | 38.0                  | 46.2                  | 53.7                  | 61.0                  | 68.3                  | 75.5                  | 83.3                  | 93.1                  |
| 19  | 27.8                  | 35.7                  | 43.0                  | 50.3                  | 57.7                  | 64.7                  | 72.1                  | 80.5                  | 90.9                  |
| 20  | 25.9                  | 33.3                  | 40.1                  | 47.1                  | 54.4                  | 61.6                  | 69.2                  | 77.9                  | 88.2                  |
| 21  | 26.5                  | 33.6                  | 40.3                  | 47.0                  | 53.7                  | 61.0                  | 68.6                  | 76.7                  | 86.9                  |
| 22  | 26.2                  | 32.6                  | 38.8                  | 45.3                  | 52.3                  | 59.4                  | 66.6                  | 75.2                  | 86.1                  |
| 23  | 25.6                  | 32.2                  | 38.1                  | 44.6                  | 51.2                  | 57.9                  | 65.1                  | 74.1                  | 85.5                  |
| 24  | 24.6                  | 30.9                  | 36.5                  | 42.9                  | 49.4                  | 56.0                  | 63.1                  | 72.2                  | 84.2                  |
| 25  | 24.1                  | 30.1                  | 35.5                  | 41.7                  | 48.2                  | 54.7                  | 62.3                  | 71.1                  | 83.5                  |
| 26  | 23.2                  | 28.7                  | 33.8                  | 39.7                  | 46.3                  | 53.2                  | 61.1                  | 69.9                  | 83.0                  |
| 27  | 23.0                  | 28.2                  | 33.2                  | 39.1                  | 45.4                  | 52.1                  | 59.7                  | 69.1                  | 81.6                  |
| 28  | 22.7                  | 28.1                  | 33.1                  | 38.4                  | 45.0                  | 51.8                  | 59.2                  | 68.1                  | 80.1                  |
| 29  | 22.2                  | 27.7                  | 32.6                  | 38.1                  | 44.2                  | 50.8                  | 58.6                  | 67.4                  | 78.6                  |
| 30  | 22.6                  | 28.1                  | 33.1                  | 38.1                  | 43.8                  | 50.0                  | 57.8                  | 66.2                  | 77.6                  |
| 31  | 22.5                  | 27.3                  | 32.2                  | 37.5                  | 43.1                  | 49.1                  | 56.0                  | 64.7                  | 77.5                  |
| 32  | 22.5                  | 27.2                  | 32.0                  | 36.9                  | 42.4                  | 48.8                  | 56.0                  | 64.1                  | 76.9                  |
| 33  | 22.4                  | 27.0                  | 31.5                  | 37.6                  | 43.0                  | 48.8                  | 55.3                  | 64.6                  | 75.8                  |
| 34  | 21.9                  | 26.3                  | 31.3                  | 36.7                  | 42.4                  | 48.4                  | 55.6                  | 64.5                  | 76.7                  |
| 35  | 21.2                  | 25.9                  | 30.4                  | 34.6                  | 40.7                  | 47.4                  | 54.4                  | 63.6                  | 76.2                  |
| 36  | 21.4                  | 26.8                  | 31.2                  | 35.7                  | 41.2                  | 47.2                  | 54.8                  | 63.8                  | 76.3                  |
| 37  | 22.0                  | 27.2                  | 32.1                  | 36.6                  | 41.8                  | 46.7                  | 53.8                  | 63.3                  | 75.4                  |
| 38  | 21.7                  | 27.1                  | 32.4                  | 37.2                  | 42.3                  | 47.7                  | 54.1                  | 63.0                  | 75.7                  |

3 **E-TABLE 2—Unadjusted\* Annual Slope and Intercept for FEV<sub>1</sub> % Predicted<sup>†</sup> Pre- and Post-Index Event**

|                     | N     | Pre-index slope (SE) | Post-index slope (SE) | Slope difference (SE) | <i>P</i> difference | Post-index increase (SE) | <i>P</i> increase | Pre-index start | Pre-index stop | Post-index start | Post-index Stop |
|---------------------|-------|----------------------|-----------------------|-----------------------|---------------------|--------------------------|-------------------|-----------------|----------------|------------------|-----------------|
| Combined (observed) | 32355 | -1.38 (0.05)         | -1.98 (0.04)          | -0.60 (0.06)          | <0.001              | -0.40 (0.06)             | <0.001            | 75.61           | 72.85          | 72.45            | 68.50           |
| Combined (uniform)  | 32355 | -1.60 (0.05)         | -1.92 (0.04)          | -0.31 (0.06)          | <0.001              | -0.36 (0.06)             | <0.001            | 73.91           | 70.70          | 70.33            | 66.50           |
| 1                   | 2155  | -4.05 (0.16)         | -1.07 (0.16)          | 2.97 (0.23)           | <0.001              | 0.00 (0.21)              | 1.00              | 54.74           | 46.65          | 46.65            | 44.50           |
| 2                   | 2511  | -3.29 (0.15)         | -1.56 (0.15)          | 1.73 (0.21)           | <0.001              | 0.01 (0.20)              | 0.95              | 61.53           | 54.95          | 54.96            | 51.84           |
| 3                   | 2874  | -2.33 (0.15)         | -1.86 (0.14)          | 0.47 (0.20)           | 0.021               | -0.47 (0.19)             | 0.014             | 65.97           | 61.32          | 60.85            | 57.12           |
| 4                   | 3091  | -2.35 (0.14)         | -1.97 (0.13)          | 0.38 (0.20)           | 0.057               | -0.10 (0.19)             | 0.59              | 70.57           | 65.88          | 65.78            | 61.85           |
| 5                   | 3292  | -1.87 (0.14)         | -2.00 (0.13)          | -0.13 (0.20)          | 0.52                | -0.14 (0.19)             | 0.46              | 73.95           | 70.21          | 70.07            | 66.08           |
| 6                   | 3428  | -1.30 (0.14)         | -1.82 (0.13)          | -0.52 (0.19)          | 0.007               | -0.58 (0.19)             | 0.002             | 76.49           | 73.90          | 73.32            | 69.68           |
| 7                   | 3639  | -0.90 (0.14)         | -1.90 (0.13)          | -1.00 (0.19)          | <0.001              | -0.36 (0.19)             | 0.059             | 78.76           | 76.96          | 76.60            | 72.81           |
| 8                   | 3768  | -0.43 (0.14)         | -2.20 (0.13)          | -1.77 (0.19)          | <0.001              | -0.69 (0.19)             | <0.001            | 81.97           | 81.12          | 80.43            | 76.03           |
| 9                   | 3782  | -0.02 (0.14)         | -2.03 (0.13)          | -2.01 (0.19)          | <0.001              | -0.92 (0.19)             | <0.001            | 85.13           | 85.08          | 84.16            | 80.10           |
| 10                  | 3815  | 0.49 (0.14)          | -2.77 (0.14)          | -3.26 (0.20)          | <0.001              | -0.40 (0.20)             | 0.040             | 89.94           | 90.92          | 90.51            | 84.98           |

4 \*Covariate include disease stage interacted with time.

5 <sup>†</sup>FEV<sub>1</sub> % predicted is calculated based on Wang and Hankinson algorithms.

6

7

1 **E-TABLE 1—FEV<sub>1</sub> % Predicted 10<sup>th</sup> to 90<sup>th</sup> Percentiles by Age for All Patients Enrolled in the ESCF**

| Age | 10 <sup>th</sup> %ile | 20 <sup>th</sup> %ile | 30 <sup>th</sup> %ile | 40 <sup>th</sup> %ile | 50 <sup>th</sup> %ile | 60 <sup>th</sup> %ile | 70 <sup>th</sup> %ile | 80 <sup>th</sup> %ile | 90 <sup>th</sup> %ile |
|-----|-----------------------|-----------------------|-----------------------|-----------------------|-----------------------|-----------------------|-----------------------|-----------------------|-----------------------|
| 8   | 50.5                  | 64.2                  | 73.6                  | 81.1                  | 87.3                  | 92.7                  | 98.1                  | 103.6                 | 111.2                 |
| 9   | 48.0                  | 62.3                  | 72.3                  | 79.7                  | 86.1                  | 91.7                  | 97.0                  | 102.9                 | 110.7                 |
| 10  | 47.7                  | 61.1                  | 71.0                  | 79.0                  | 85.4                  | 91.0                  | 96.4                  | 102.2                 | 109.8                 |
| 11  | 46.2                  | 60.0                  | 69.8                  | 77.5                  | 84.0                  | 89.8                  | 95.4                  | 101.3                 | 109.0                 |
| 12  | 42.4                  | 55.5                  | 65.8                  | 74.0                  | 81.2                  | 87.4                  | 93.4                  | 99.9                  | 107.9                 |
| 13  | 40.2                  | 52.5                  | 62.9                  | 71.3                  | 78.4                  | 84.8                  | 91.3                  | 97.9                  | 106.4                 |
| 14  | 37.7                  | 49.7                  | 59.8                  | 68.0                  | 75.4                  | 82.1                  | 88.8                  | 95.8                  | 104.5                 |
| 15  | 35.2                  | 46.2                  | 55.8                  | 64.2                  | 71.8                  | 78.9                  | 85.6                  | 93.0                  | 102.0                 |
| 16  | 32.9                  | 43.3                  | 52.3                  | 60.2                  | 67.5                  | 74.5                  | 81.4                  | 89.0                  | 98.4                  |
| 17  | 31.2                  | 40.4                  | 49.1                  | 56.8                  | 64.1                  | 71.1                  | 78.3                  | 86.1                  | 95.6                  |
| 18  | 29.1                  | 38.0                  | 46.2                  | 53.7                  | 61.0                  | 68.3                  | 75.5                  | 83.3                  | 93.1                  |
| 19  | 27.8                  | 35.7                  | 43.0                  | 50.3                  | 57.7                  | 64.7                  | 72.1                  | 80.5                  | 90.9                  |
| 20  | 25.9                  | 33.3                  | 40.1                  | 47.1                  | 54.4                  | 61.6                  | 69.2                  | 77.9                  | 88.2                  |
| 21  | 26.5                  | 33.6                  | 40.3                  | 47.0                  | 53.7                  | 61.0                  | 68.6                  | 76.7                  | 86.9                  |
| 22  | 26.2                  | 32.6                  | 38.8                  | 45.3                  | 52.3                  | 59.4                  | 66.6                  | 75.2                  | 86.1                  |
| 23  | 25.6                  | 32.2                  | 38.1                  | 44.6                  | 51.2                  | 57.9                  | 65.1                  | 74.1                  | 85.5                  |
| 24  | 24.6                  | 30.9                  | 36.5                  | 42.9                  | 49.4                  | 56.0                  | 63.1                  | 72.2                  | 84.2                  |
| 25  | 24.1                  | 30.1                  | 35.5                  | 41.7                  | 48.2                  | 54.7                  | 62.3                  | 71.1                  | 83.5                  |
| 26  | 23.2                  | 28.7                  | 33.8                  | 39.7                  | 46.3                  | 53.2                  | 61.1                  | 69.9                  | 83.0                  |
| 27  | 23.0                  | 28.2                  | 33.2                  | 39.1                  | 45.4                  | 52.1                  | 59.7                  | 69.1                  | 81.6                  |
| 28  | 22.7                  | 28.1                  | 33.1                  | 38.4                  | 45.0                  | 51.8                  | 59.2                  | 68.1                  | 80.1                  |
| 29  | 22.2                  | 27.7                  | 32.6                  | 38.1                  | 44.2                  | 50.8                  | 58.6                  | 67.4                  | 78.6                  |
| 30  | 22.6                  | 28.1                  | 33.1                  | 38.1                  | 43.8                  | 50.0                  | 57.8                  | 66.2                  | 77.6                  |
| 31  | 22.5                  | 27.3                  | 32.2                  | 37.5                  | 43.1                  | 49.1                  | 56.0                  | 64.7                  | 77.5                  |
| 32  | 22.5                  | 27.2                  | 32.0                  | 36.9                  | 42.4                  | 48.8                  | 56.0                  | 64.1                  | 76.9                  |
| 33  | 22.4                  | 27.0                  | 31.5                  | 37.6                  | 43.0                  | 48.8                  | 55.3                  | 64.6                  | 75.8                  |
| 34  | 21.9                  | 26.3                  | 31.3                  | 36.7                  | 42.4                  | 48.4                  | 55.6                  | 64.5                  | 76.7                  |
| 35  | 21.2                  | 25.9                  | 30.4                  | 34.6                  | 40.7                  | 47.4                  | 54.4                  | 63.6                  | 76.2                  |
| 36  | 21.4                  | 26.8                  | 31.2                  | 35.7                  | 41.2                  | 47.2                  | 54.8                  | 63.8                  | 76.3                  |
| 37  | 22.0                  | 27.2                  | 32.1                  | 36.6                  | 41.8                  | 46.7                  | 53.8                  | 63.3                  | 75.4                  |
| 38  | 21.7                  | 27.1                  | 32.4                  | 37.2                  | 42.3                  | 47.7                  | 54.1                  | 63.0                  | 75.7                  |

2 **E-TABLE 2—Unadjusted\* Annual Slope and Intercept for FEV<sub>1</sub> % Predicted<sup>†</sup> Pre- and Post-Index Event**

|                     | N     | Pre-index slope (SE) | Post-index slope (SE) | Slope difference (SE) | <i>P</i> difference | Post-index increase (SE) | <i>P</i> increase | Pre-index start | Pre-index stop | Post-index start | Post-index Stop |
|---------------------|-------|----------------------|-----------------------|-----------------------|---------------------|--------------------------|-------------------|-----------------|----------------|------------------|-----------------|
| Combined (observed) | 32355 | -1.38 (0.05)         | -1.98 (0.04)          | -0.60 (0.06)          | <0.001              | -0.40 (0.06)             | <0.001            | 75.61           | 72.85          | 72.45            | 68.50           |
| Combined (uniform)  | 32355 | -1.60 (0.05)         | -1.92 (0.04)          | -0.31 (0.06)          | <0.001              | -0.36 (0.06)             | <0.001            | 73.91           | 70.70          | 70.33            | 66.50           |
| 1                   | 2155  | -4.05 (0.16)         | -1.07 (0.16)          | 2.97 (0.23)           | <0.001              | 0.00 (0.21)              | 1.00              | 54.74           | 46.65          | 46.65            | 44.50           |
| 2                   | 2511  | -3.29 (0.15)         | -1.56 (0.15)          | 1.73 (0.21)           | <0.001              | 0.01 (0.20)              | 0.95              | 61.53           | 54.95          | 54.96            | 51.84           |
| 3                   | 2874  | -2.33 (0.15)         | -1.86 (0.14)          | 0.47 (0.20)           | 0.021               | -0.47 (0.19)             | 0.014             | 65.97           | 61.32          | 60.85            | 57.12           |
| 4                   | 3091  | -2.35 (0.14)         | -1.97 (0.13)          | 0.38 (0.20)           | 0.057               | -0.10 (0.19)             | 0.59              | 70.57           | 65.88          | 65.78            | 61.85           |
| 5                   | 3292  | -1.87 (0.14)         | -2.00 (0.13)          | -0.13 (0.20)          | 0.52                | -0.14 (0.19)             | 0.46              | 73.95           | 70.21          | 70.07            | 66.08           |
| 6                   | 3428  | -1.30 (0.14)         | -1.82 (0.13)          | -0.52 (0.19)          | 0.007               | -0.58 (0.19)             | 0.002             | 76.49           | 73.90          | 73.32            | 69.68           |
| 7                   | 3639  | -0.90 (0.14)         | -1.90 (0.13)          | -1.00 (0.19)          | <0.001              | -0.36 (0.19)             | 0.059             | 78.76           | 76.96          | 76.60            | 72.81           |
| 8                   | 3768  | -0.43 (0.14)         | -2.20 (0.13)          | -1.77 (0.19)          | <0.001              | -0.69 (0.19)             | <0.001            | 81.97           | 81.12          | 80.43            | 76.03           |
| 9                   | 3782  | -0.02 (0.14)         | -2.03 (0.13)          | -2.01 (0.19)          | <0.001              | -0.92 (0.19)             | <0.001            | 85.13           | 85.08          | 84.16            | 80.10           |
| 10                  | 3815  | 0.49 (0.14)          | -2.77 (0.14)          | -3.26 (0.20)          | <0.001              | -0.40 (0.20)             | 0.040             | 89.94           | 90.92          | 90.51            | 84.98           |

3 \*Covariate include disease stage interacted with time.

4 <sup>†</sup>FEV<sub>1</sub> % predicted is calculated based on Wang and Hankinson algorithms.

5

6

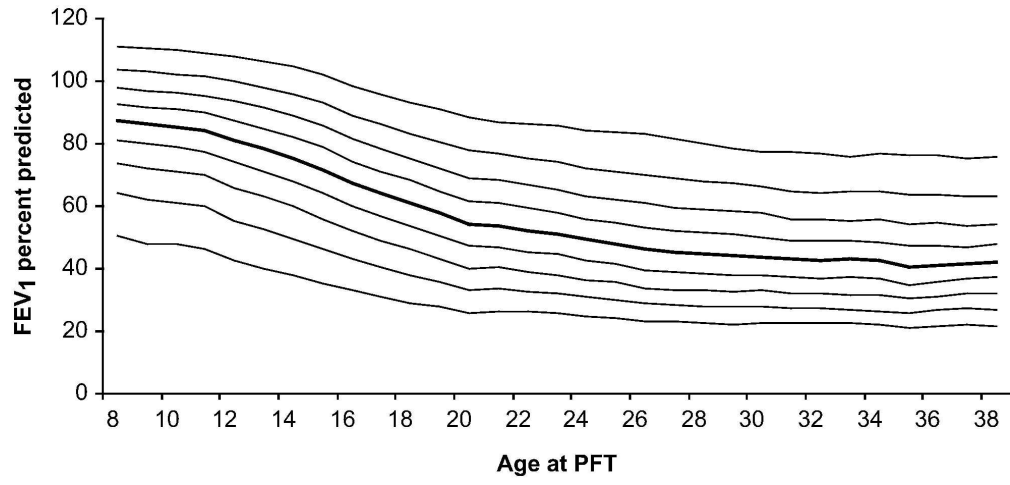

168x79mm (600 x 600 DPI)

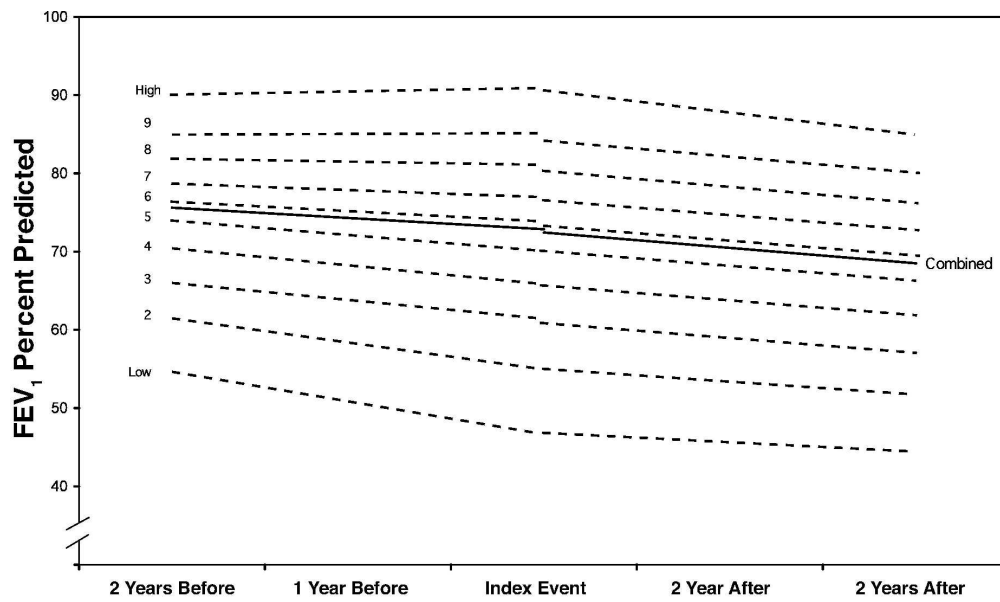

156x94mm (600 x 600 DPI)

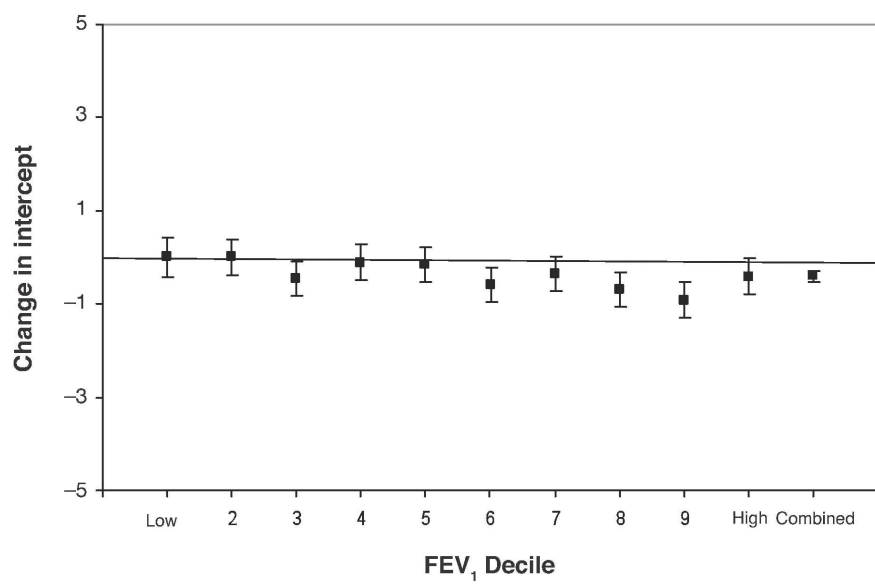

177x127mm (600 x 600 DPI)



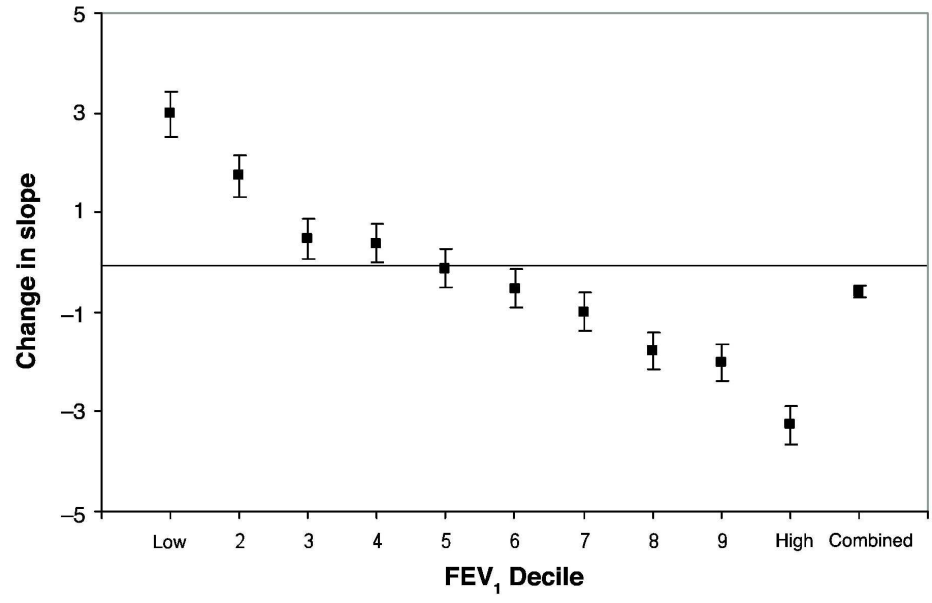

167x112mm (600 x 600 DPI)
